# Supplementary material for: Wireless high-resolution surface facial electromyography mask for discrimination of standardized facial expressions in healthy adults
Source: PubMed Central journal article supplement (PMC11336214; doi:10.1038/s41598-024-70205-z), 2024-08-20

## **Paul Funk et al. Wireless high-resolution surface facial electromyography analysis with adhesive electrode array foils for discrimination of standardized facial expressions in healthy adults: A prospective observational study**

### **Legends**

**Supplementary Figure S1.** Overview of the standardized facial movements (page 2)

**Supplementary Figures S2-12.** Average sEMG activation of all subjects of the different facial electrodes (channels) shown for each exercise separately (pages 3-13).

The upper graph always shows meant amplitude values of the sEMG (rms values in  $\mu\text{V}$ ). The lower graph always shows relative values normalized to the maximum (separately per run). Statistically significant differences between runs are symbolized with dots (R1 vs. R2), rectangles (R1 vs. R3), and triangles (R2 vs. R3).

### **Abbreviations for the 11 exercises in sequence of presentation:**

|     |                             |
|-----|-----------------------------|
| R   | at rest                     |
| WF  | wrinkling of the forehead   |
| CEN | closing the eyes normally   |
| CEF | closing the eyes forcefully |
| WN  | wrinkling of the nose       |
| CMS | closed mouth smiling        |
| OMS | open mouth smiling          |
| LP  | lip puckering               |
| BC  | blowing-out the cheeks      |
| S   | snarling                    |
| DLL | depressing lower lips       |

## The standardized exercises

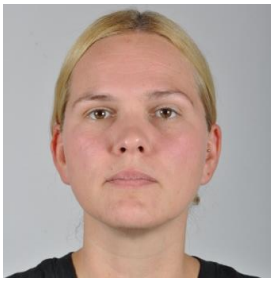

Face at rest  
(R)

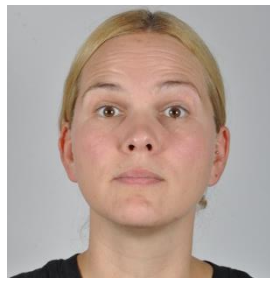

Wrinkling of the forehead  
(WF)

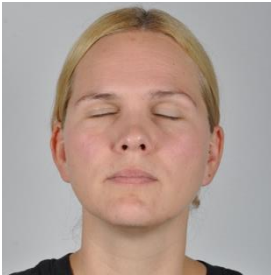

Closing the eyes normally  
(CEN)

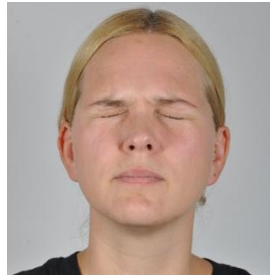

closing the eyes forcefully  
(CEF)

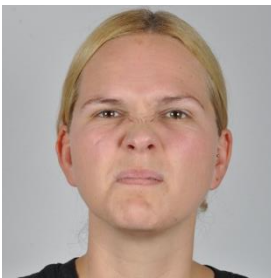

Wrinkling of the nose  
(WN)

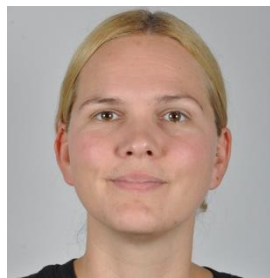

Closed mouth smiling  
(CMS)

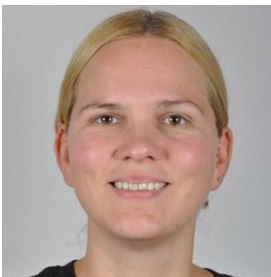

Open mouth smiling  
(OMS)

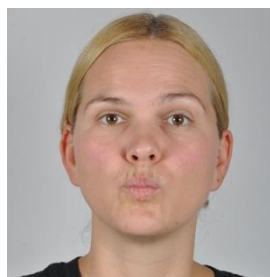

Lip puckering  
(LP)

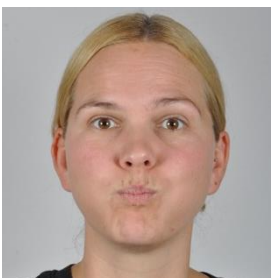

Blowing-out the cheeks  
(BC)

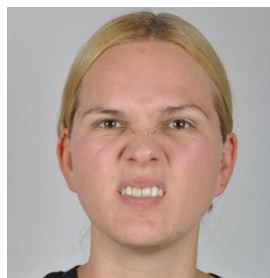

Snarling  
(S)

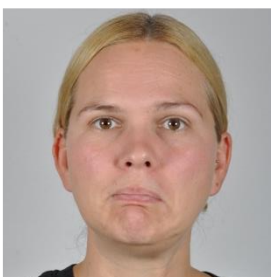

Depressing lower lips  
(DLL)

# Exercise At rest (R)

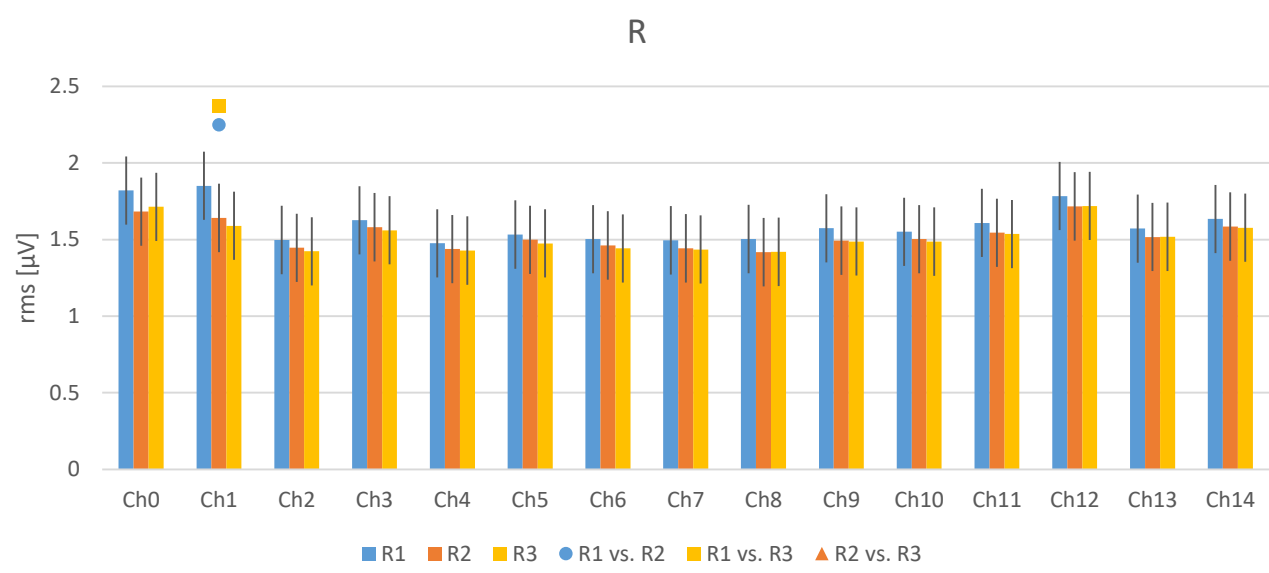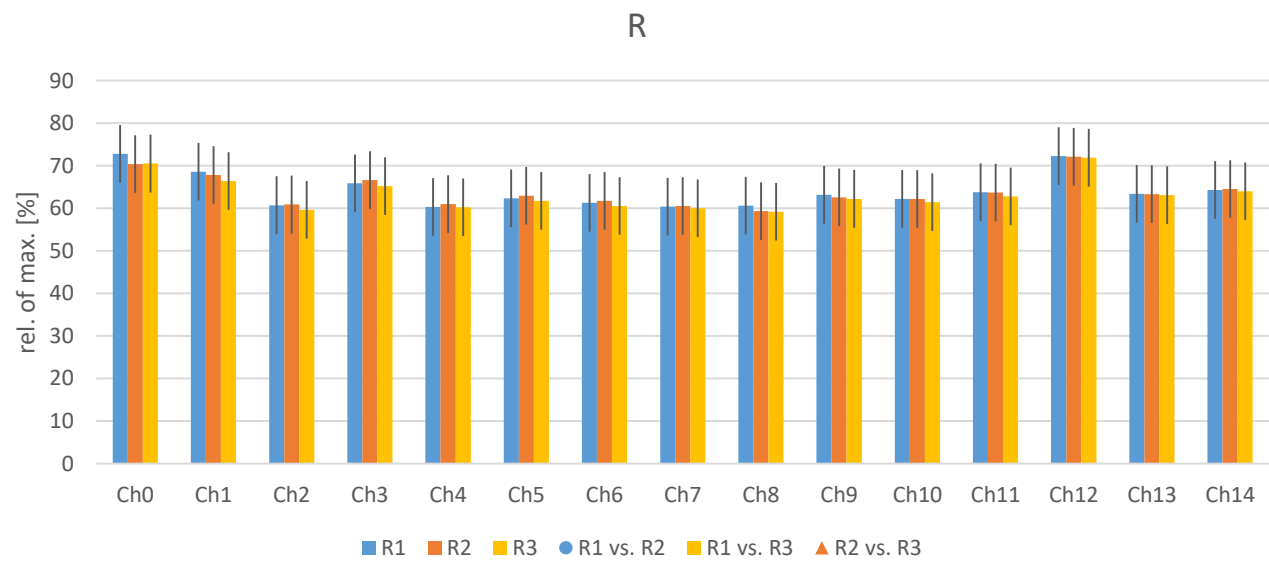

# Exercise

## Wrinkling of the forehead (WF)

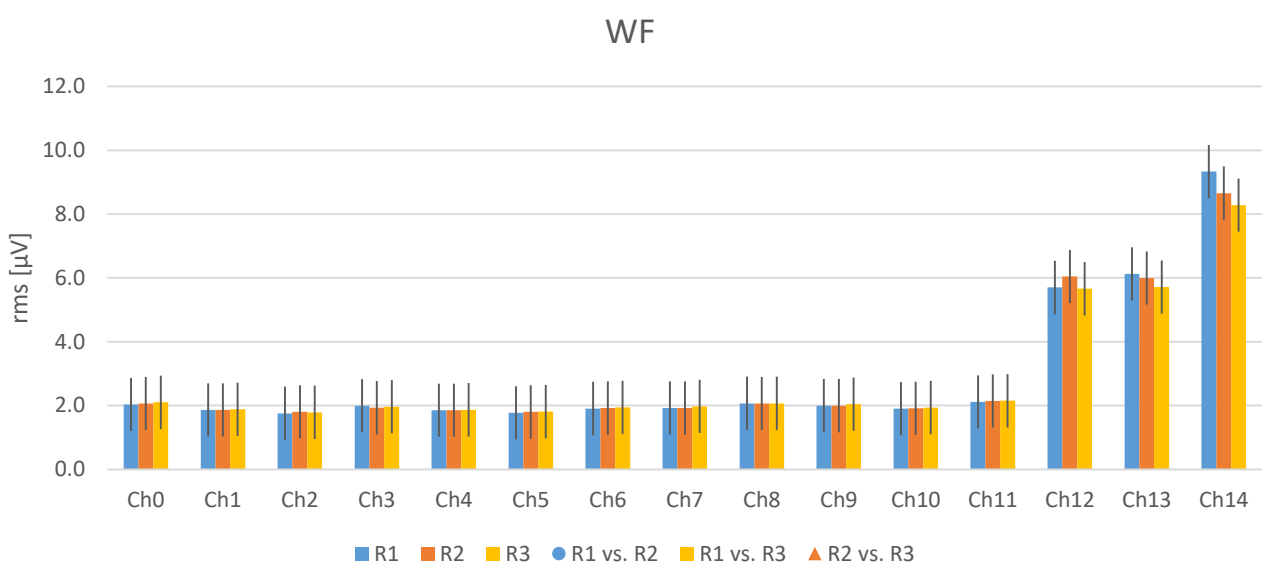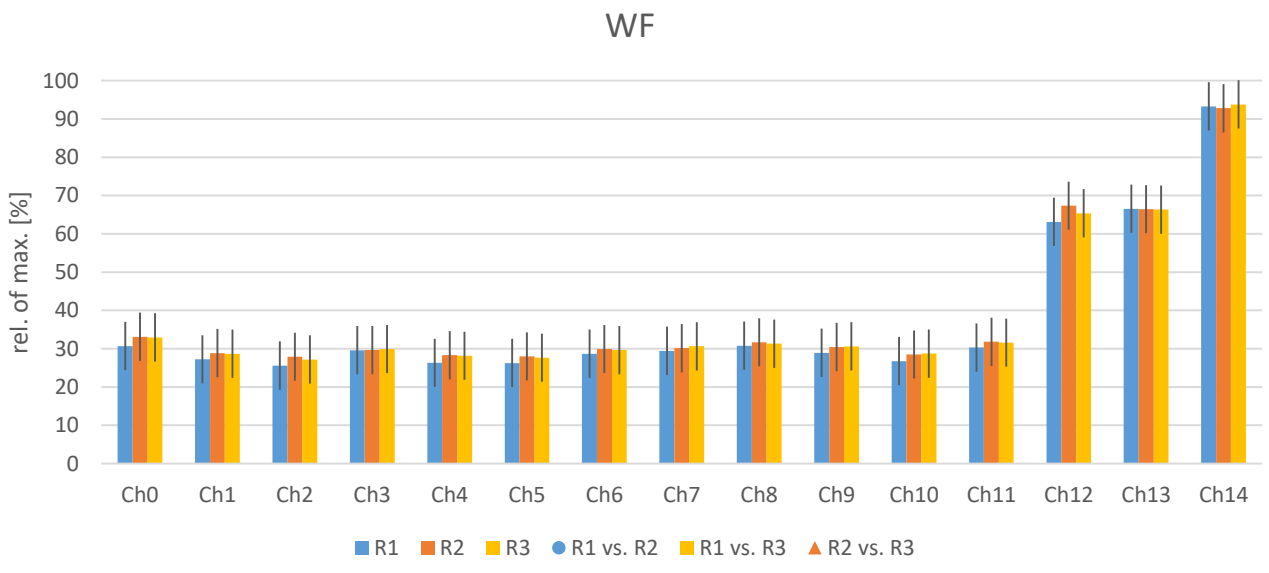

# Exercise

## Closing the eyes normally (CEN)

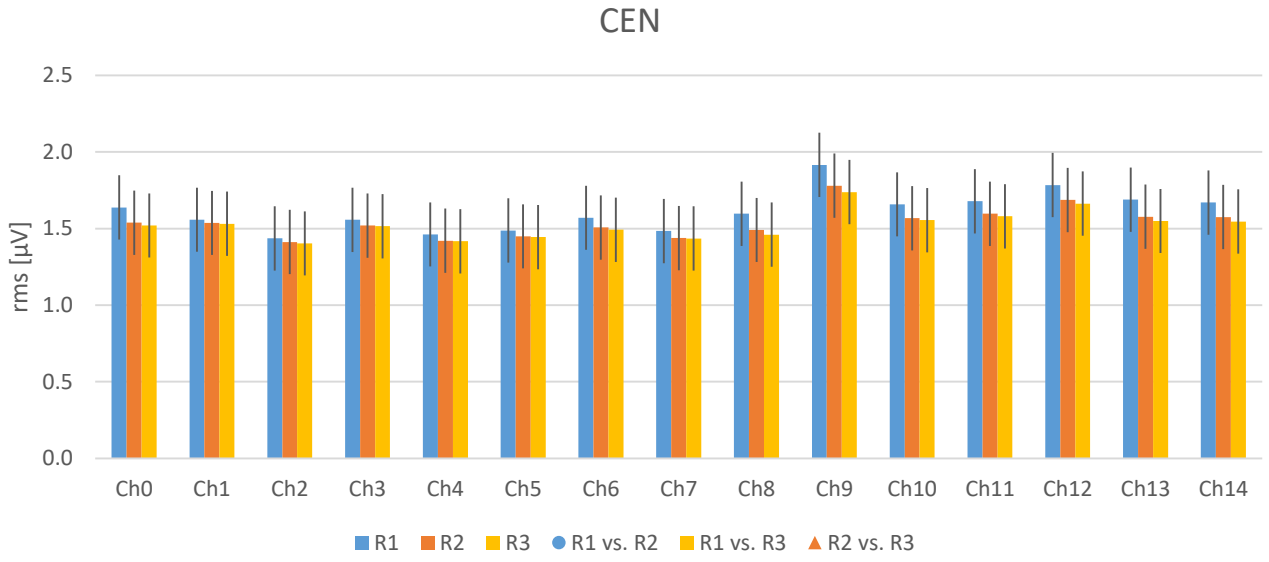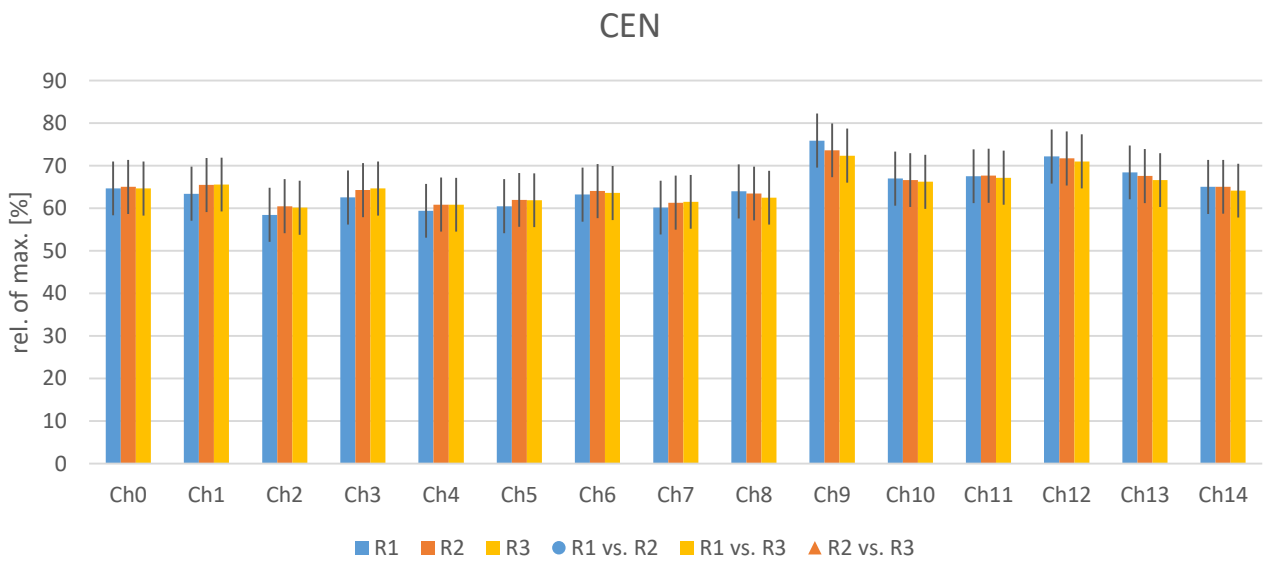

# Exercise

## Closing the eyes forcefully (CEF)

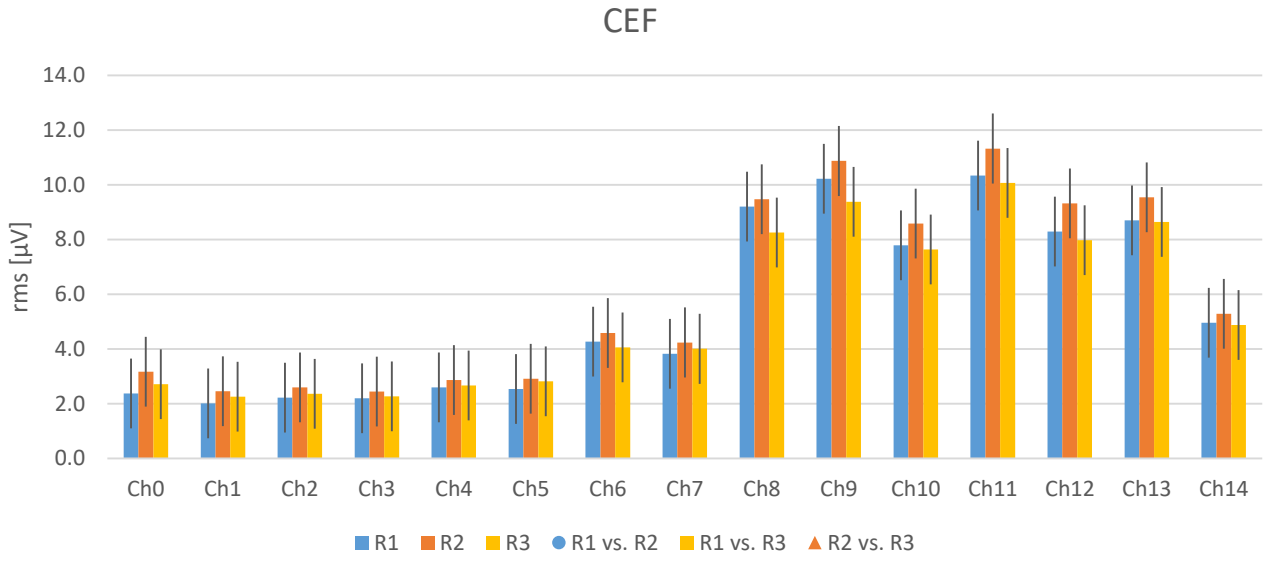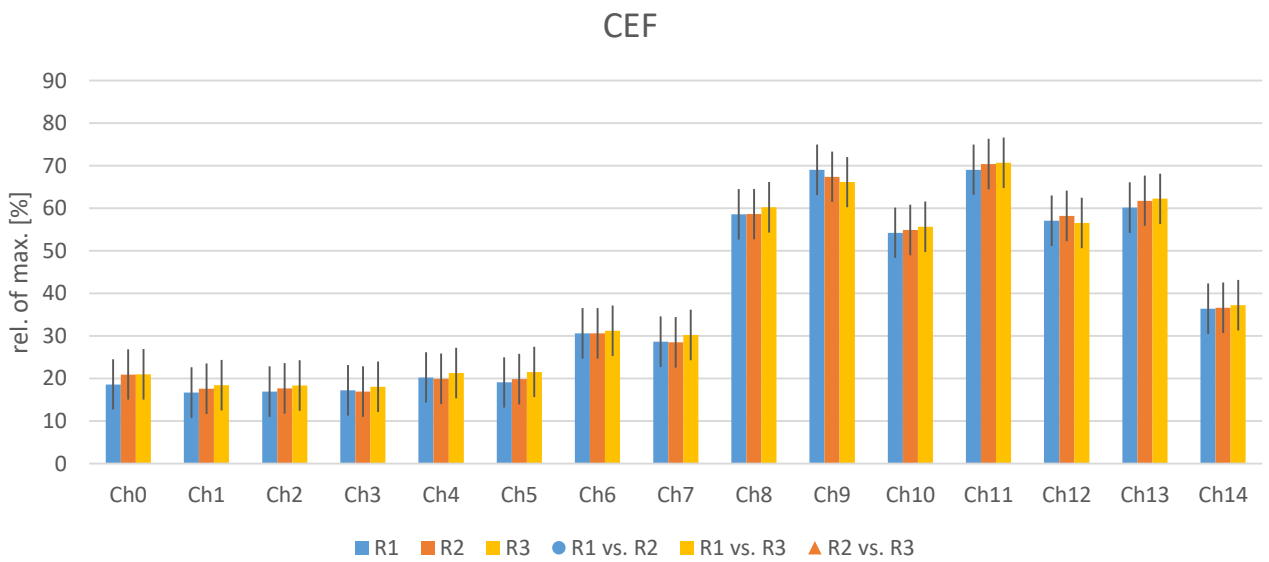

# Exercise

## Wrinkling of the nose (WN)

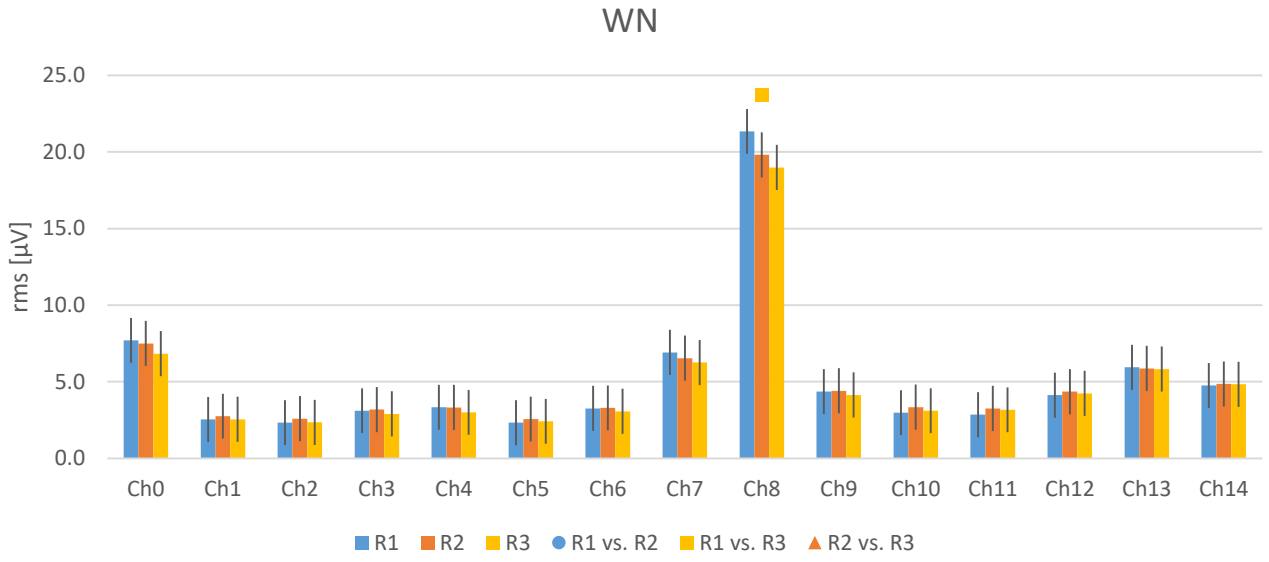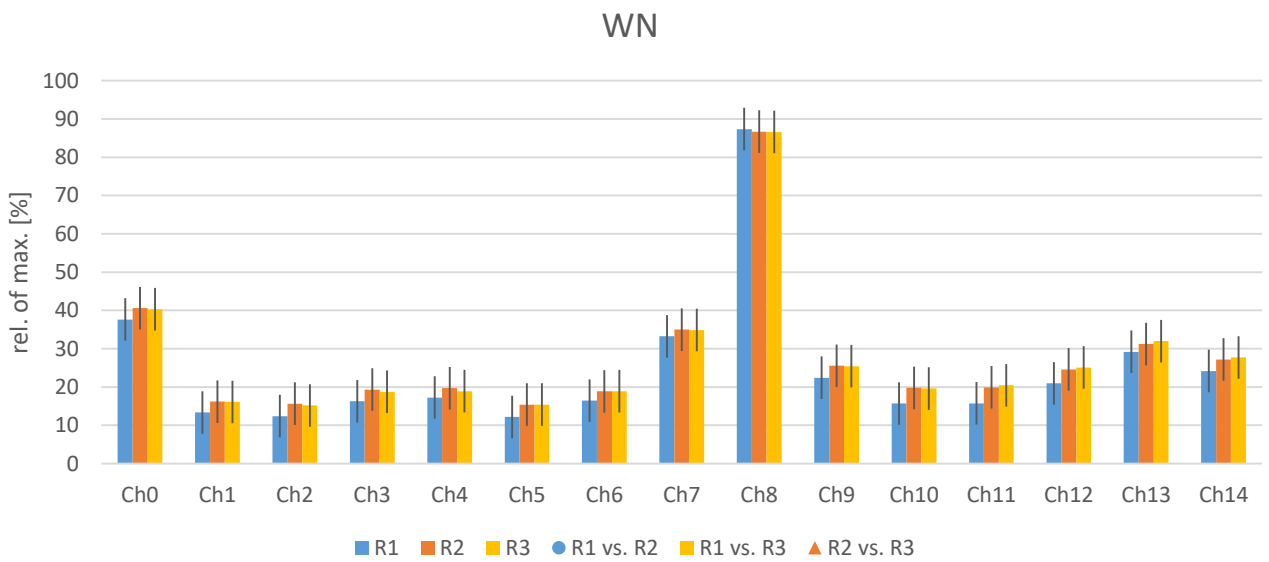

# Exercise

## Closed mouth smiling (CMS)

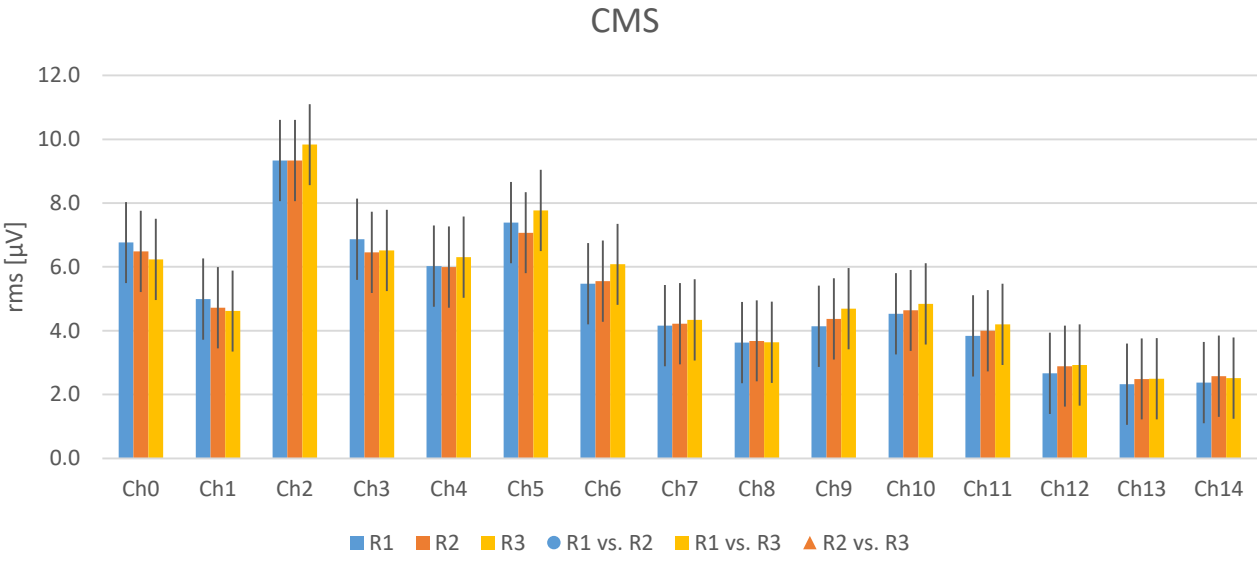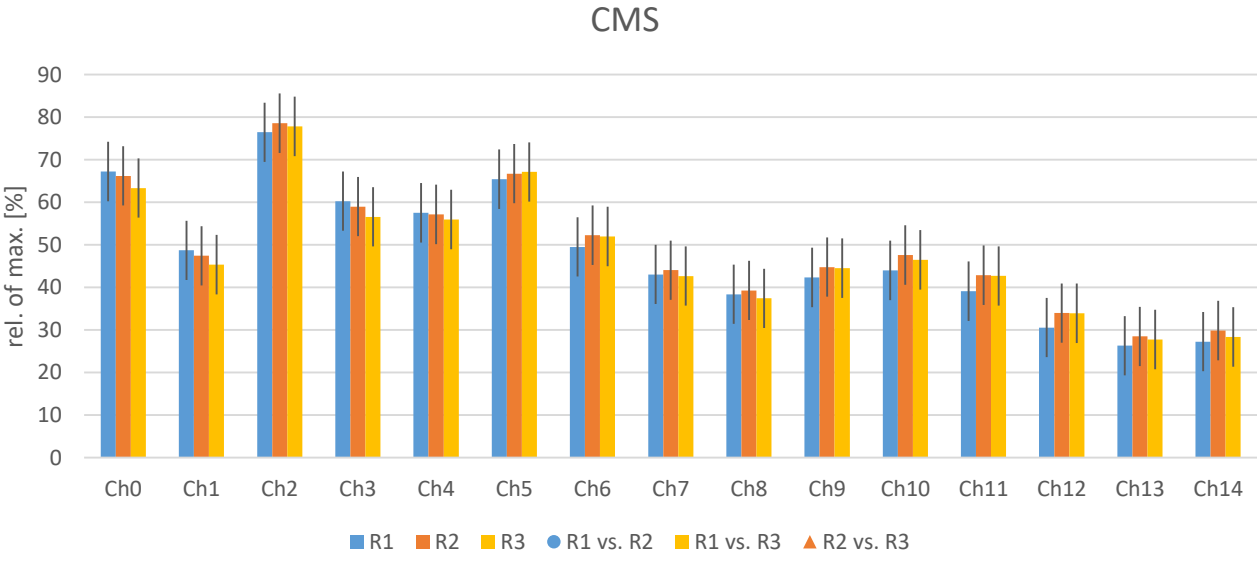



# Exercise

## Open mouth smiling (OMS)

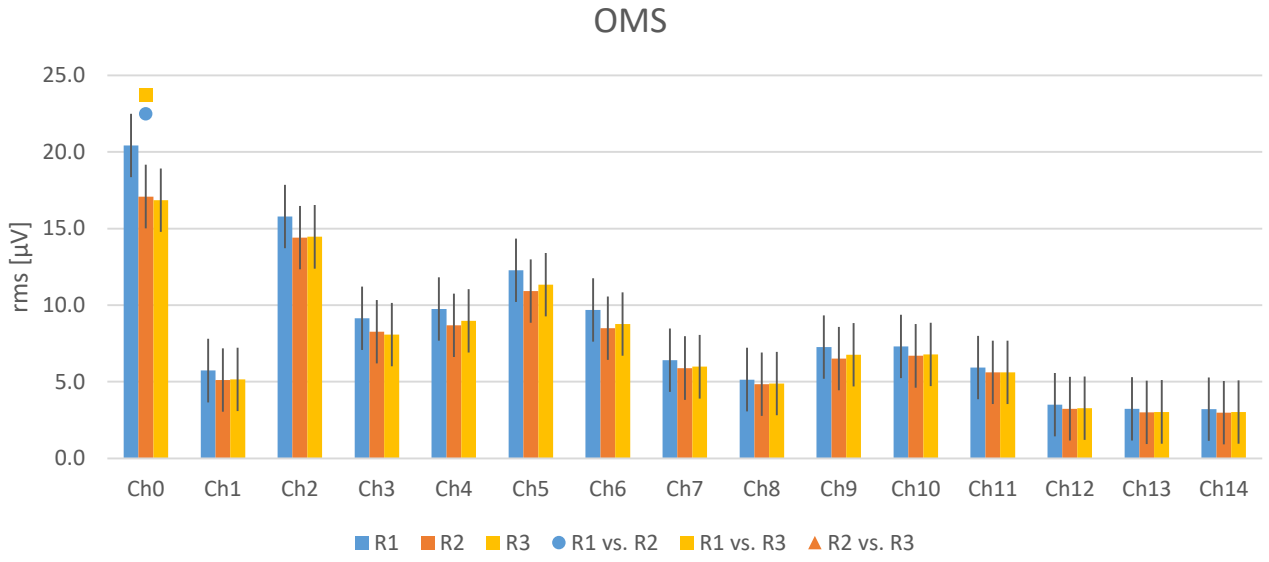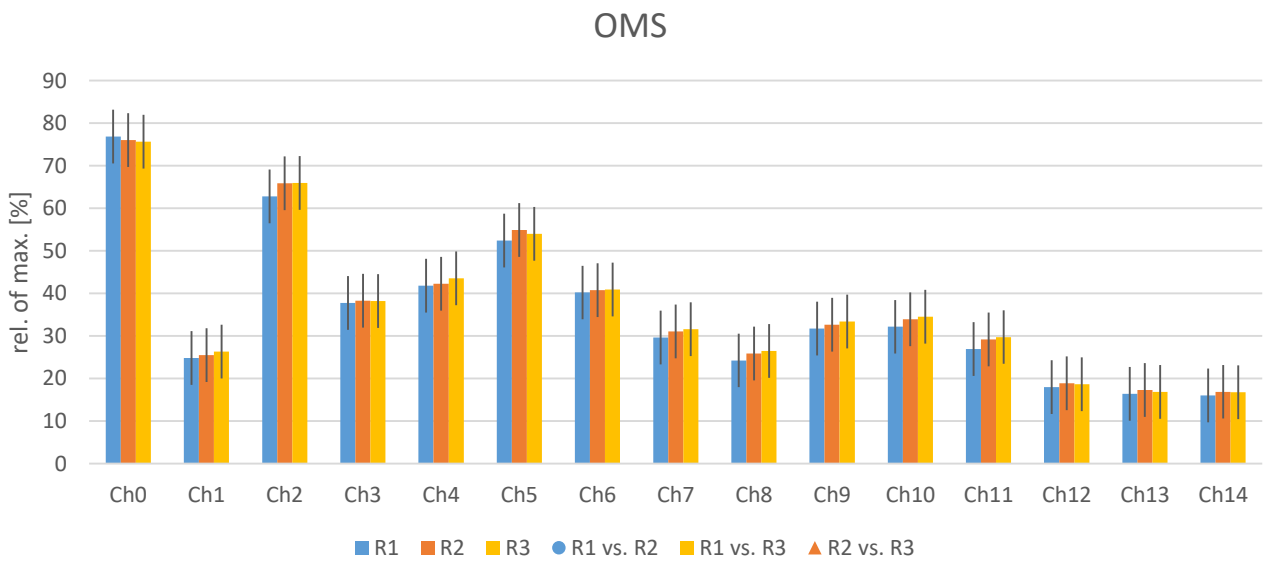

# Exercise Lip puckering (LP)

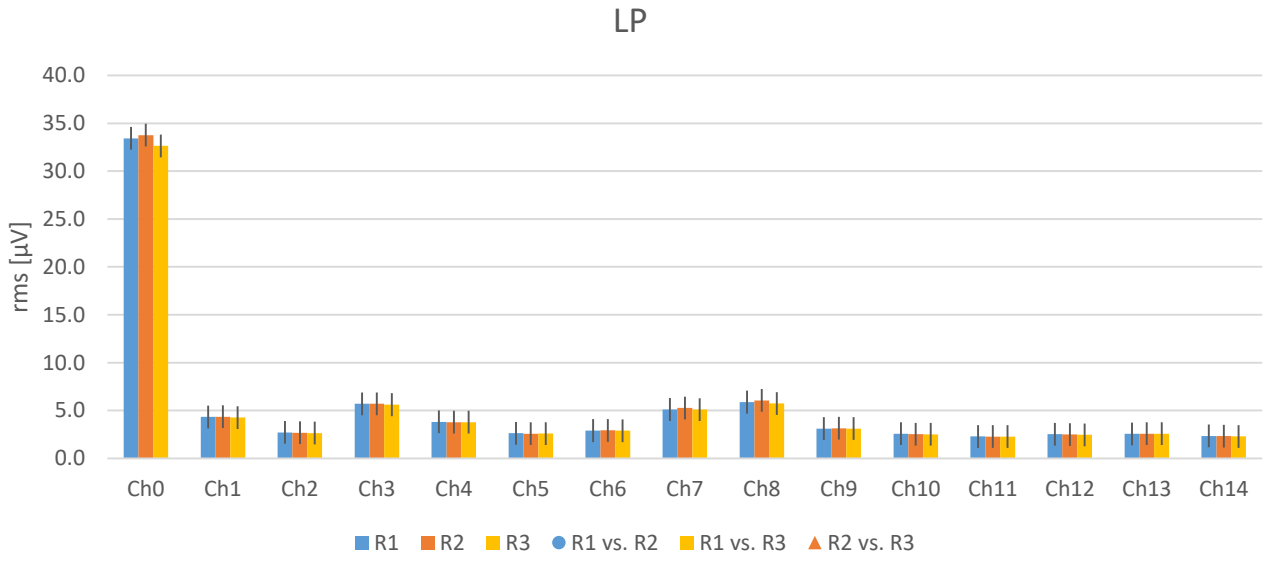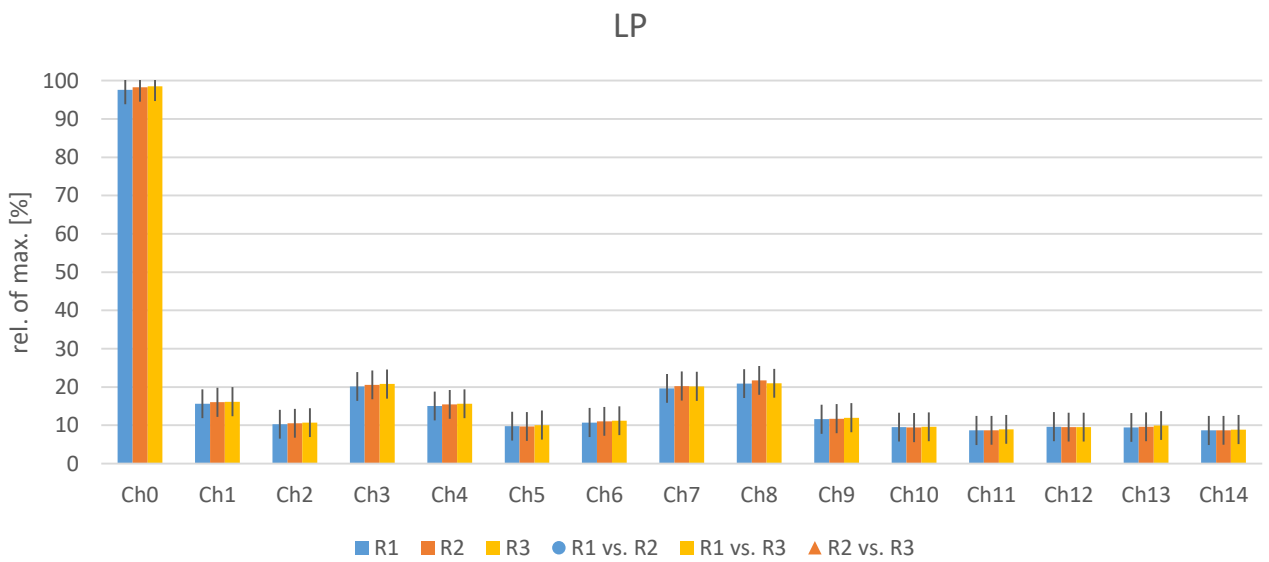

# Exercise

## Blowing-out the cheeks (BC)

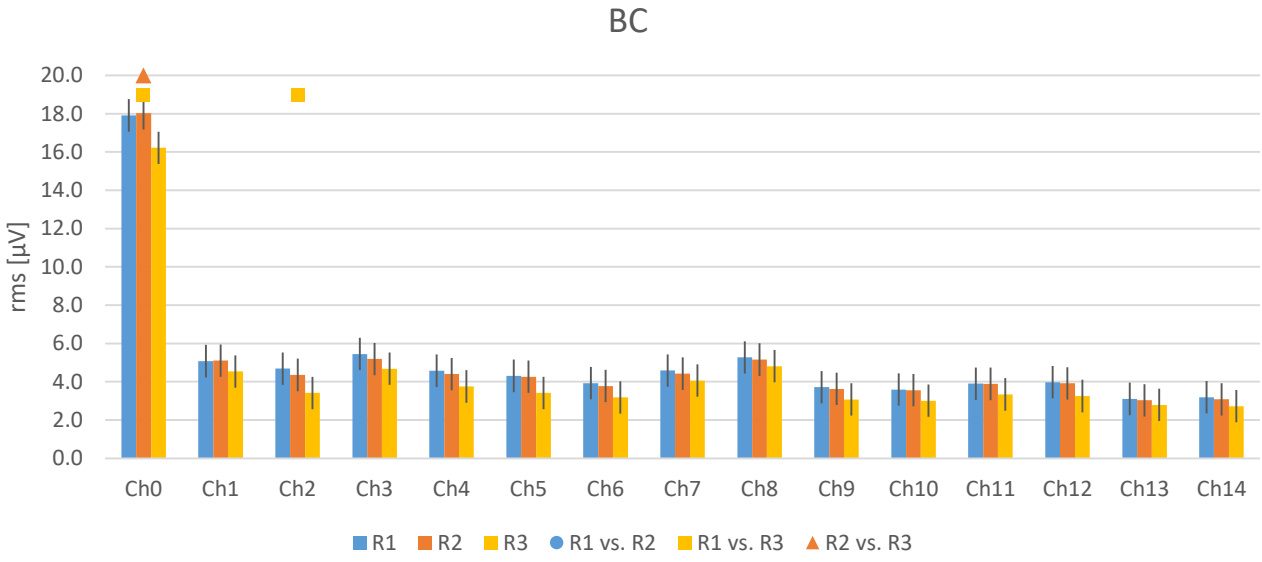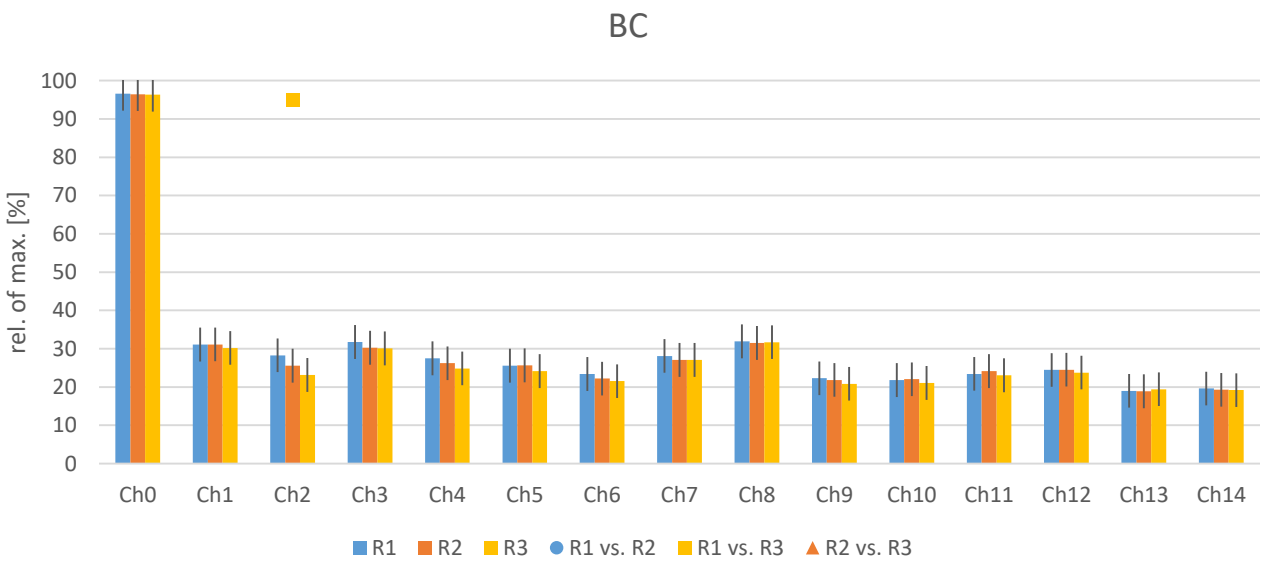

# Exercise Snarling (S)

S

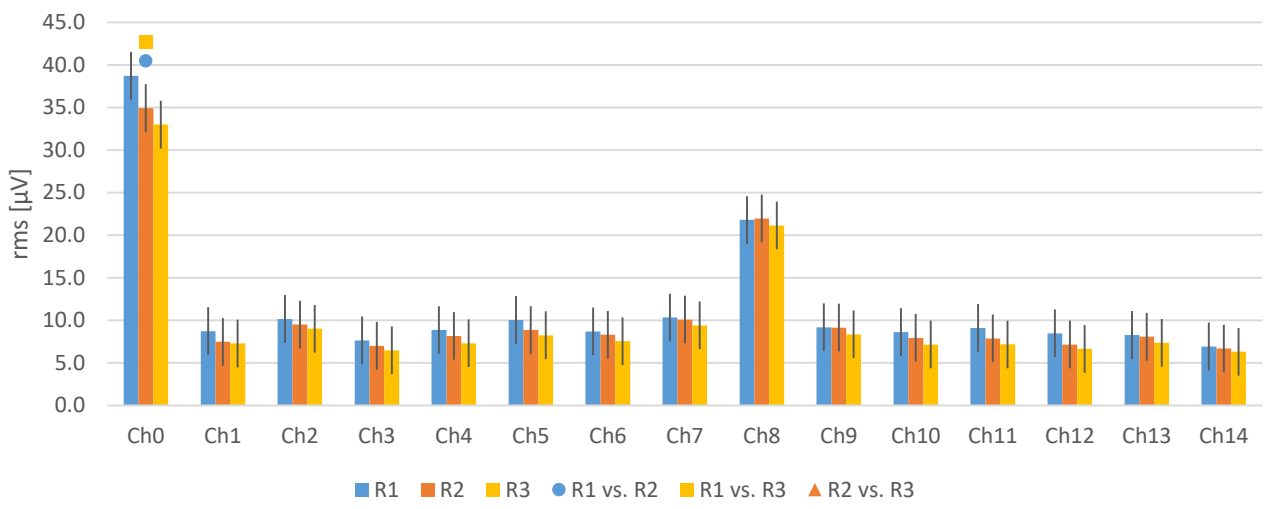

S

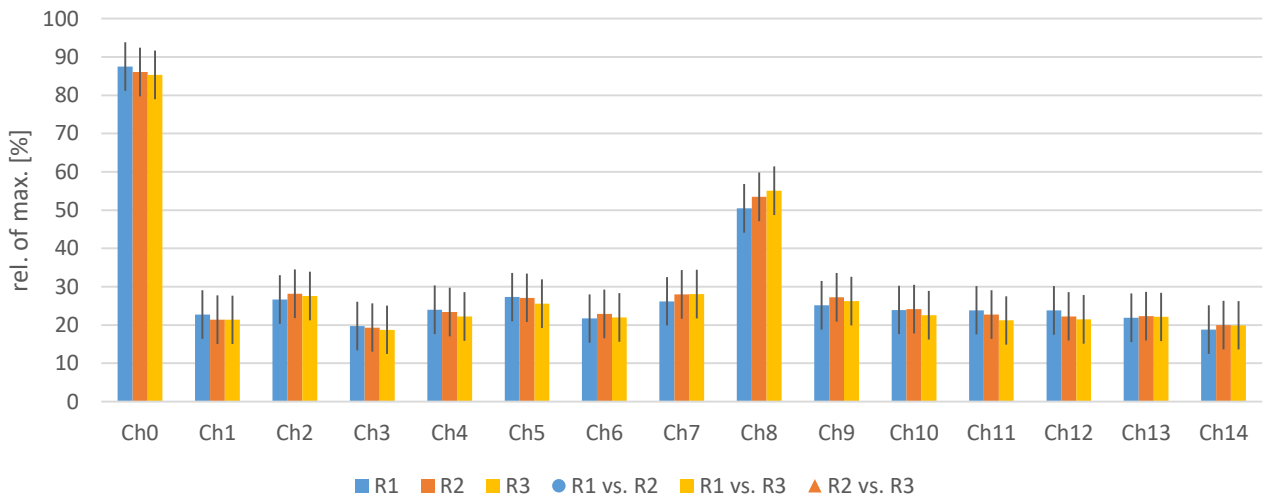

# Exercise

## Depressing the lower lips (DLL)

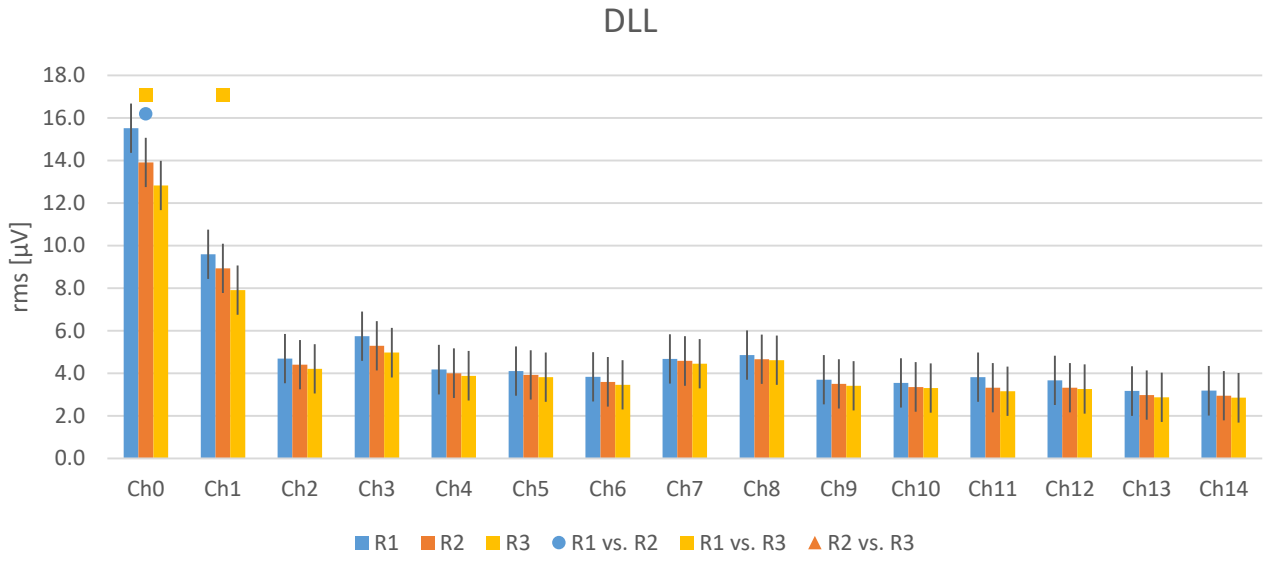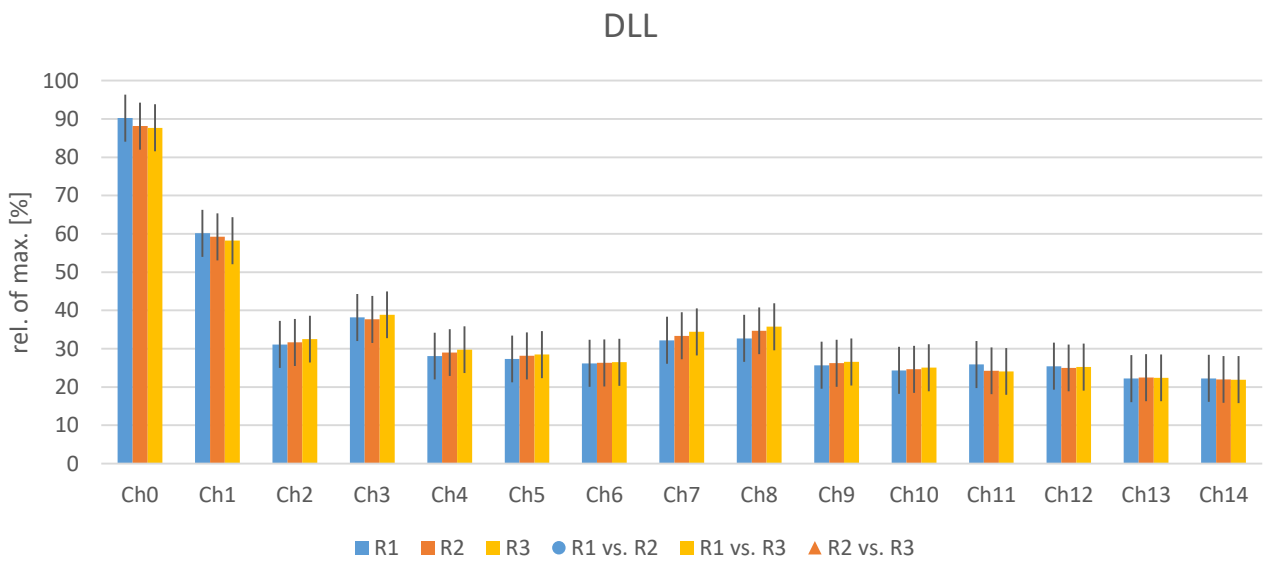

Supplement: 41598_2024_70205_MOESM1_ESM.pdf [file 41598_2024_70205_MOESM1_ESM.pdf]
